# Supplementary material for: Batch Effects during Human Bone Marrow Stromal Cell Propagation Prevail Donor Variation and Culture Duration: Impact on Genotype, Phenotype and Function
Source: MDPI journal article supplement (doi:10.3390/cells11060946), 2022-03-10
Supplement: s1 [file s1]

**Supplementary Table S1.** List of genes in alphabetical order related to viral response, metabolism or interferon response found significantly upregulated in hPL compared to FBS.

| Genes           | Viral<br>response | Metabolism | Interferon<br>response | Gene Description                                          |
|-----------------|-------------------|------------|------------------------|-----------------------------------------------------------|
| <i>ABCC9</i>    | x                 |            |                        | ATP-binding cassette subfamily C member 9                 |
| <i>ACAA2</i>    |                   | x          |                        | acetyl-CoA acyltransferase 2                              |
| <i>ACADVL</i>   |                   | x          |                        | acyl-CoA dehydrogenase very long chain                    |
| <i>ACSL5</i>    |                   | x          |                        | acyl-CoA synthetase long chain family member 5            |
| <i>ACSM5</i>    |                   | x          |                        | acyl-CoA synthetase medium chain family member 5          |
| <i>ACSS1</i>    |                   | x          |                        | acyl-CoA synthetase short chain family member 1           |
| <i>AKR1C2</i>   |                   | x          |                        | aldo-keto reductase family 1 member C2                    |
| <i>AKR1C3</i>   |                   | x          |                        | aldo-keto reductase family 1 member C3                    |
| <i>APOBEC3C</i> | x                 |            |                        | apolipoprotein B mRNA editing enzyme catalytic subunit 3C |
| <i>APOBEC3D</i> | x                 |            |                        | apolipoprotein B mRNA editing enzyme catalytic subunit 3D |
| <i>APOBEC3F</i> | x                 |            |                        | apolipoprotein B mRNA editing enzyme catalytic subunit 3F |
| <i>APOBEC3G</i> | x                 |            |                        | apolipoprotein B mRNA editing enzyme catalytic subunit 3G |
| <i>ARRB1</i>    | x                 |            |                        | arrestin beta 1                                           |
| <i>ASPA</i>     |                   | x          |                        | aspartoacylase                                            |
| <i>BST2</i>     | x                 |            | x                      | bone marrow stromal cell antigen 2                        |
| <i>C19orf66</i> | x                 |            | x                      |                                                           |
| <i>C4A</i>      | x                 |            |                        | complement C4A (Rodgers blood group)                      |
| <i>C4B</i>      | x                 |            |                        | complement C4B (Chido blood group)                        |
| <i>CARD16</i>   | x                 |            |                        | caspase recruitment domain family member 16               |
| <i>CASP1</i>    | x                 |            | x                      | caspase 1                                                 |
| <i>CASP7</i>    | x                 |            |                        | caspase 7                                                 |
| <i>CASP8</i>    | x                 |            |                        | caspase 8                                                 |
| <i>CCL2</i>     |                   |            | x                      | C-C motif chemokine ligand 2                              |
| <i>CD40</i>     | x                 |            | x                      | CD40 molecule                                             |
| <i>CD74</i>     | x                 | x          |                        | CD74 molecule                                             |
| <i>CDO1</i>     |                   | x          |                        | cysteine dioxygenase type 1                               |
| <i>CLU</i>      | x                 |            |                        | clusterin                                                 |
| <i>CPT1A</i>    |                   | x          |                        | carnitine palmitoyltransferase 1A                         |
| <i>DDX58</i>    | x                 |            |                        | DEXD/H-box helicase 58                                    |
| <i>DDX60</i>    | x                 |            |                        | DEXD/H-box helicase 60                                    |
| <i>DECR1</i>    |                   | x          |                        | 2,4-dienoyl-CoA reductase 1                               |
| <i>DLD</i>      |                   | x          |                        | dihydrolipoamide dehydrogenase                            |
| <i>DTX3L</i>    | x                 |            |                        | deltex E3 ubiquitin ligase 3L                             |
| <i>ECH1</i>     |                   | x          |                        | enoyl-CoA hydratase 1                                     |
| <i>ECI2</i>     |                   | x          |                        | enoyl-CoA delta isomerase 2                               |

|                 |   |   |                                                                               |
|-----------------|---|---|-------------------------------------------------------------------------------|
| <i>EPHX2</i>    |   | x | epoxide hydrolase 2                                                           |
| <i>ETFA</i>     |   | x | electron transfer flavoprotein subunit alpha                                  |
| <i>ETFB</i>     |   | x | electron transfer flavoprotein subunit beta                                   |
| <i>F2R</i>      | x |   | coagulation factor II thrombin receptor                                       |
| <i>F2RL1</i>    | x |   | F2R like trypsin receptor 1                                                   |
| <i>FAH</i>      |   | x | fumarylacetoacetate hydrolase                                                 |
| <i>FMC1</i>     |   | x | formation of mitochondrial complex V assembly factor 1 homolog                |
| <i>GALM</i>     |   | x | galactose mutarotase                                                          |
| <i>GBP2</i>     |   | x | guanylate binding protein 2                                                   |
| <i>GSTZ1</i>    |   | x | glutathione S-transferase zeta 1                                              |
| <i>HADHA</i>    |   | x | hydroxyacyl-CoA dehydrogenase trifunctional multienzyme complex subunit alpha |
| <i>HADHB</i>    |   | x | hydroxyacyl-CoA dehydrogenase trifunctional multienzyme complex subunit beta  |
| <i>HLA-DPA1</i> |   | x | major histocompatibility complex, class II, DP alpha 1                        |
| <i>HLA-DPB1</i> |   | x | major histocompatibility complex, class II, DP beta 1                         |
| <i>IFI16</i>    | x |   | interferon gamma inducible protein 16                                         |
| <i>IFI30</i>    |   | x | IFI30 lysosomal thiol reductase                                               |
| <i>IFI6</i>     | x |   | interferon alpha inducible protein 6                                          |
| <i>IFIH1</i>    | x |   | interferon induced with helicase C domain 1                                   |
| <i>IFIT3</i>    | x |   | interferon induced protein with tetratricopeptide repeats 3                   |
| <i>IFITM2</i>   | x | x | interferon induced transmembrane protein 2                                    |
| <i>IFT57</i>    | x |   | intraflagellar transport 57                                                   |
| <i>IL15</i>     | x |   | interleukin 15                                                                |
| <i>IRF1</i>     | x | x | interferon regulatory factor 1                                                |
| <i>IRF2</i>     | x | x | interferon regulatory factor 2                                                |
| <i>KCNJ8</i>    | x |   | potassium inwardly rectifying channel subfamily J member 8                    |
| <i>LXN</i>      | x |   | latexin                                                                       |
| <i>MX1</i>      | x |   | MX dynamin like GTPase 1                                                      |
| <i>MX2</i>      | x |   | MX dynamin like GTPase 2                                                      |
| <i>MYC</i>      | x |   | MYC proto-oncogene, bHLH transcription factor                                 |
| <i>NELFCD</i>   | x |   | negative elongation factor complex member C/D                                 |
| <i>NMI</i>      |   | x | N-myc and STAT interactor                                                     |
| <i>NTSR1</i>    |   | x | neurotensin receptor 1                                                        |
| <i>NUDT7</i>    |   | x | nudix hydrolase 7                                                             |
| <i>OAS3</i>     | x | x | 2'-5'-oligoadenylate synthetase 3                                             |
| <i>OASL</i>     | x | x | 2'-5'-oligoadenylate synthetase like                                          |
| <i>PCCA</i>     |   | x | propionyl-CoA carboxylase subunit alpha                                       |
| <i>PDK4</i>     |   | x | pyruvate dehydrogenase kinase 4                                               |
| <i>PLCD4</i>    |   | x | phospholipase C delta 4                                                       |
| <i>PLSCR1</i>   | x |   | phospholipid scramblase 1                                                     |
| <i>PML</i>      | x | x | PML nuclear body scaffold                                                     |
| <i>PPARG</i>    | x | x | peroxisome proliferator-activated receptor gamma                              |
| <i>PIIB</i>     | x |   | peptidylprolyl isomerase B                                                    |

|                 |   |   |                                            |
|-----------------|---|---|--------------------------------------------|
| <i>PSMB8</i>    | x |   | proteasome 20S subunit beta 8              |
| <i>PSMB9</i>    | x |   | proteasome 20S subunit beta 9              |
| <i>PTGS1</i>    |   | x | prostaglandin-endoperoxide synthase 1      |
| <i>PYCARD</i>   | x |   | PYD and CARD domain containing             |
| <i>RARRES3</i>  |   | x | retinoic acid receptor responder protein 3 |
| <i>RTP4</i>     | x |   | receptor transporter protein 4             |
| <i>SERPINF1</i> | x |   | serpin family F member 1                   |
| <i>SOCS3</i>    |   | x | suppressor of cytokine signaling 3         |
| <i>TKFC</i>     | x | x | triokinase and FMN cyclase                 |
| <i>TLR3</i>     | x | x | toll-like receptor 3                       |
| <i>TNFSF10</i>  | x |   | TNF superfamily member 10                  |
| <i>TRIM21</i>   | x | x | tripartite motif-containing 21             |
| <i>TSPAN32</i>  | x |   | tetraspanin 32                             |
| <i>TSPAN6</i>   | x |   | tetraspanin 6                              |

---
